# Supplementary material for: Complete genome sequence and transcriptomics analyses reveal pigment biosynthesis and regulatory mechanisms in an industrial strain, Monascus purpureus YY-1
Source: PubMed Central journal article supplement (PMC4321180; doi:10.1038/srep08331), 2015-02-09
Supplement: srep08331-s1.pdf [file srep08331-s1.pdf]

**Complete genome sequence and transcriptomics analyses reveal pigment biosynthesis and regulatory mechanisms in an industrial strain, *Monascus purpureus* YY-1**

Yue Yang<sup>1†</sup>, Bin Liu<sup>2†</sup>, Xinjun Du<sup>1†</sup>, Ping Li<sup>1</sup>, Bin Liang<sup>1</sup>, Xiaozhen Cheng<sup>1</sup>,  
Liangcheng Du<sup>3</sup>, Di Huang<sup>2</sup>, Lei Wang<sup>2</sup>, ShuoWang<sup>1\*</sup>

<sup>1</sup> Key Laboratory of Food Nutrition and Safety, Tianjin University of Science and Technology, Tianjin 300457, China

<sup>2</sup> TEDA Institute of Biological Sciences and Biotechnology, Nankai University, Tianjin 300457, China

<sup>3</sup> Department of Chemistry, University of Nebraska-Lincoln, Lincoln, Nebraska 68588, United States

† These authors contributed equally to this work and should be treated as co-first author.

\*Corresponding Author: Dr. ShuoWang: s.wang@tust.edu.cn

## Supplementary Tables

**Supplementary Table S1. Statistical characteristics of the *M. purpureus* YY-1 genome assembly**

| Large scaffolds (>1000 bps): |            | Large contigs (>1000 bps): |            |
|------------------------------|------------|----------------------------|------------|
| Largest scaffold             | C1         | Largest contig             |            |
| Largest length               | 4,109,886  | Largest length             | 166,030    |
| No. of large scaffolds       | 33         | No. of large contigs       | 1102       |
| Bases in large scaffolds     | 24,147,356 | Bases in large contigs     | 22,216,052 |
| N50 scaffold                 | 4          | N50 contig                 | 208        |
| N50 length                   | 2,821,034  | N50 length                 | 32,919     |
| N90 scaf                     | 7          | N90 contig                 | 669        |
| N90 length                   | 2,248,774  | N90 length                 | 9814       |
| GC content                   | 49.14%     | GC content                 | 49.14%     |

**Supplementary Table S2. Polyketide synthases of *M. purpureus* YY-1: gene location, orthologs and putative functions**

| PKS   | chromosome location | Size (bp) | Closest matches                                      | Similarity % | Type & putative function/product in other fungi           |
|-------|---------------------|-----------|------------------------------------------------------|--------------|-----------------------------------------------------------|
| PKS 1 | Evm.model.C1.1084   | 8388      | <i>Aspergillus clavatus</i> XP_001270320.1           | 78           | Polyketide synthase                                       |
|       |                     |           | <i>Colletotrichum gloeosporioides</i> XM_007272514.1 | 71           | Polyketide synthase                                       |
|       |                     |           | <i>Magnaporthe oryzae</i> XP_003717383.1             | 67           | Fatty acid synthase S-acetyl-transferase                  |
| PKS 2 | Evm.model.C1.1255   | 9034      | <i>Penicillium chrysogenum</i> XM_002567484.1        | 70           | Hypothetical protein                                      |
|       |                     |           | <i>Penicillium chrysogenum</i> AM920436.1            | 68           |                                                           |
|       |                     |           | <i>Penicillium marneffeii</i> HM070051.1             | 68           | Polyketide synthase (PKS7)                                |
| PKS 3 | Evm.model.C2.25     | 6535      | <i>Monascus purpureus</i> AJ414729.1                 | 99           | Polyketide synthase (pks1)                                |
|       |                     |           | <i>Monascus purpureus</i> AY954028.1                 | 99           | Polyketide synthase (PKS1)                                |
|       |                     |           | <i>Vulpicida pinastri</i> AB267849.1                 | 74           | Polyketide synthase                                       |
| PKS 4 | Evm.model.C5.137    | 8144      | <i>Monascus purpureus</i> JX866749.1                 | 99           | Transcription factor and non-reducing polyketide synthase |

---

|       |                  |      |                                             |     |                                      |
|-------|------------------|------|---------------------------------------------|-----|--------------------------------------|
|       |                  |      | <i>Monascus pilosus</i> KC148521.1          | 97  | Pigment biosynthetic gene cluster    |
|       |                  |      | <i>Penicillium marneffei</i> HM070047.1     | 67  | Polyketide synthase (PKS3)           |
|       |                  |      | <i>Penicillium marneffei</i> XM_002149733.1 | 67  | Polyketide synthase                  |
| PKS 5 | Evm.model.C6.123 | 9140 | <i>Monascus aurantiacus</i> EU309474.1      | 100 | Citrinin biosynthesis gene cluster   |
|       |                  |      | <i>Monascus purpureus</i> AB243687.1        | 100 | Citrinin biosynthesis                |
|       |                  |      | <i>Monascus purpureus</i> AB167465.1        | 100 | Citrinin polyketide synthase (pksCT) |
| PKS 6 | Evm.model.C8.37  | 8519 | <i>Monascus purpureus</i> AY312161.1        | 99  | Like polyketide synthase             |
|       |                  |      | <i>Monascus purpureus</i> AY312162.1        | 99  | Like polyketide synthase             |
|       |                  |      | <i>Monascus purpureus</i> AY312164.1        | 98  | Like polyketide synthase             |

---

## Supplementary Figures

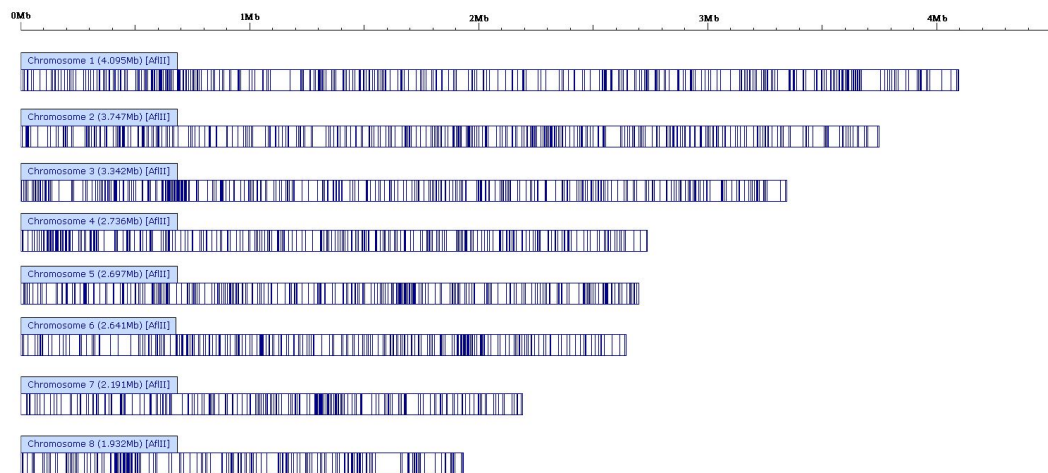

**Supplementary Figure S1. An optical map of *M. purpureus* YY-1 consisting of eight chromosomes.** Each vertical line represents an *AflIII* restriction site.

Chromosomes are ranked by size.

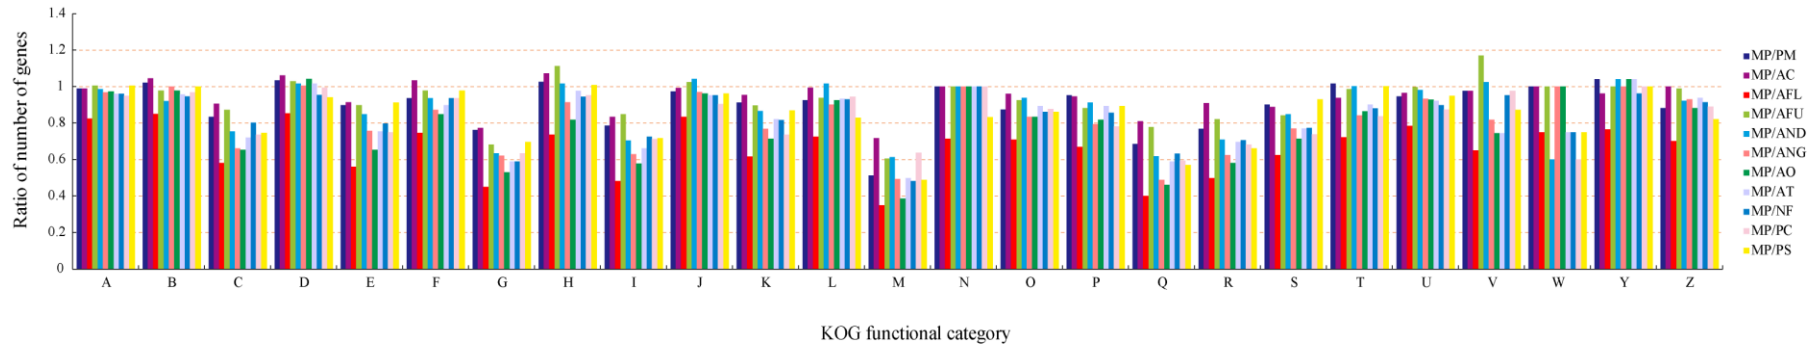

**Figure S2. A comparison of relative gene numbers for each KOG.** The ratios of the number of genes in *M. purpureus* against those in *P. marneffei* (MP/PM), *A. clavatus* (MP/AC), *A. flavus* (MP/AFL), *A. fumigatus* (MP/AFU), *A. nidulans* (MP/AND), *A. niger* (MP/ANG), *A. oryzae* (MP/AO), *A. terreus* (MP/AT), *N. fischeri* (MP/NF), *P. chrysogenum* (MP/PC) and *P. stipitatus* (MP/PS) for each KOG category were calculated. KOG functional category: A, RNA processing and modification; B, chromatin structure and dynamics; C, energy production and conversion; D, cell cycle control, cell division, chromosome partitioning; E, RNA processing and modification; F, nucleotide transport and metabolism; G, carbohydrate transport and metabolism; H, coenzyme transport and metabolism; I, lipid transport and metabolism; J, translation, ribosomal structure and biogenesis; K, transcription; L, replication, recombination and repair; M, cell wall/membrane/envelope biogenesis; N, cell motility; O, posttranslational modification, protein turnover, chaperones; P, inorganic ion transport and metabolism; Q, secondary

metabolites biosynthesis, transport and catabolism; R, general function prediction only; S, function unknown; T, signal transduction mechanisms; U, intracellular trafficking, secretion, and vesicular transport; V, defense mechanisms; W, extracellular structures; Y, nuclear structure; Z, cytoskeleton.





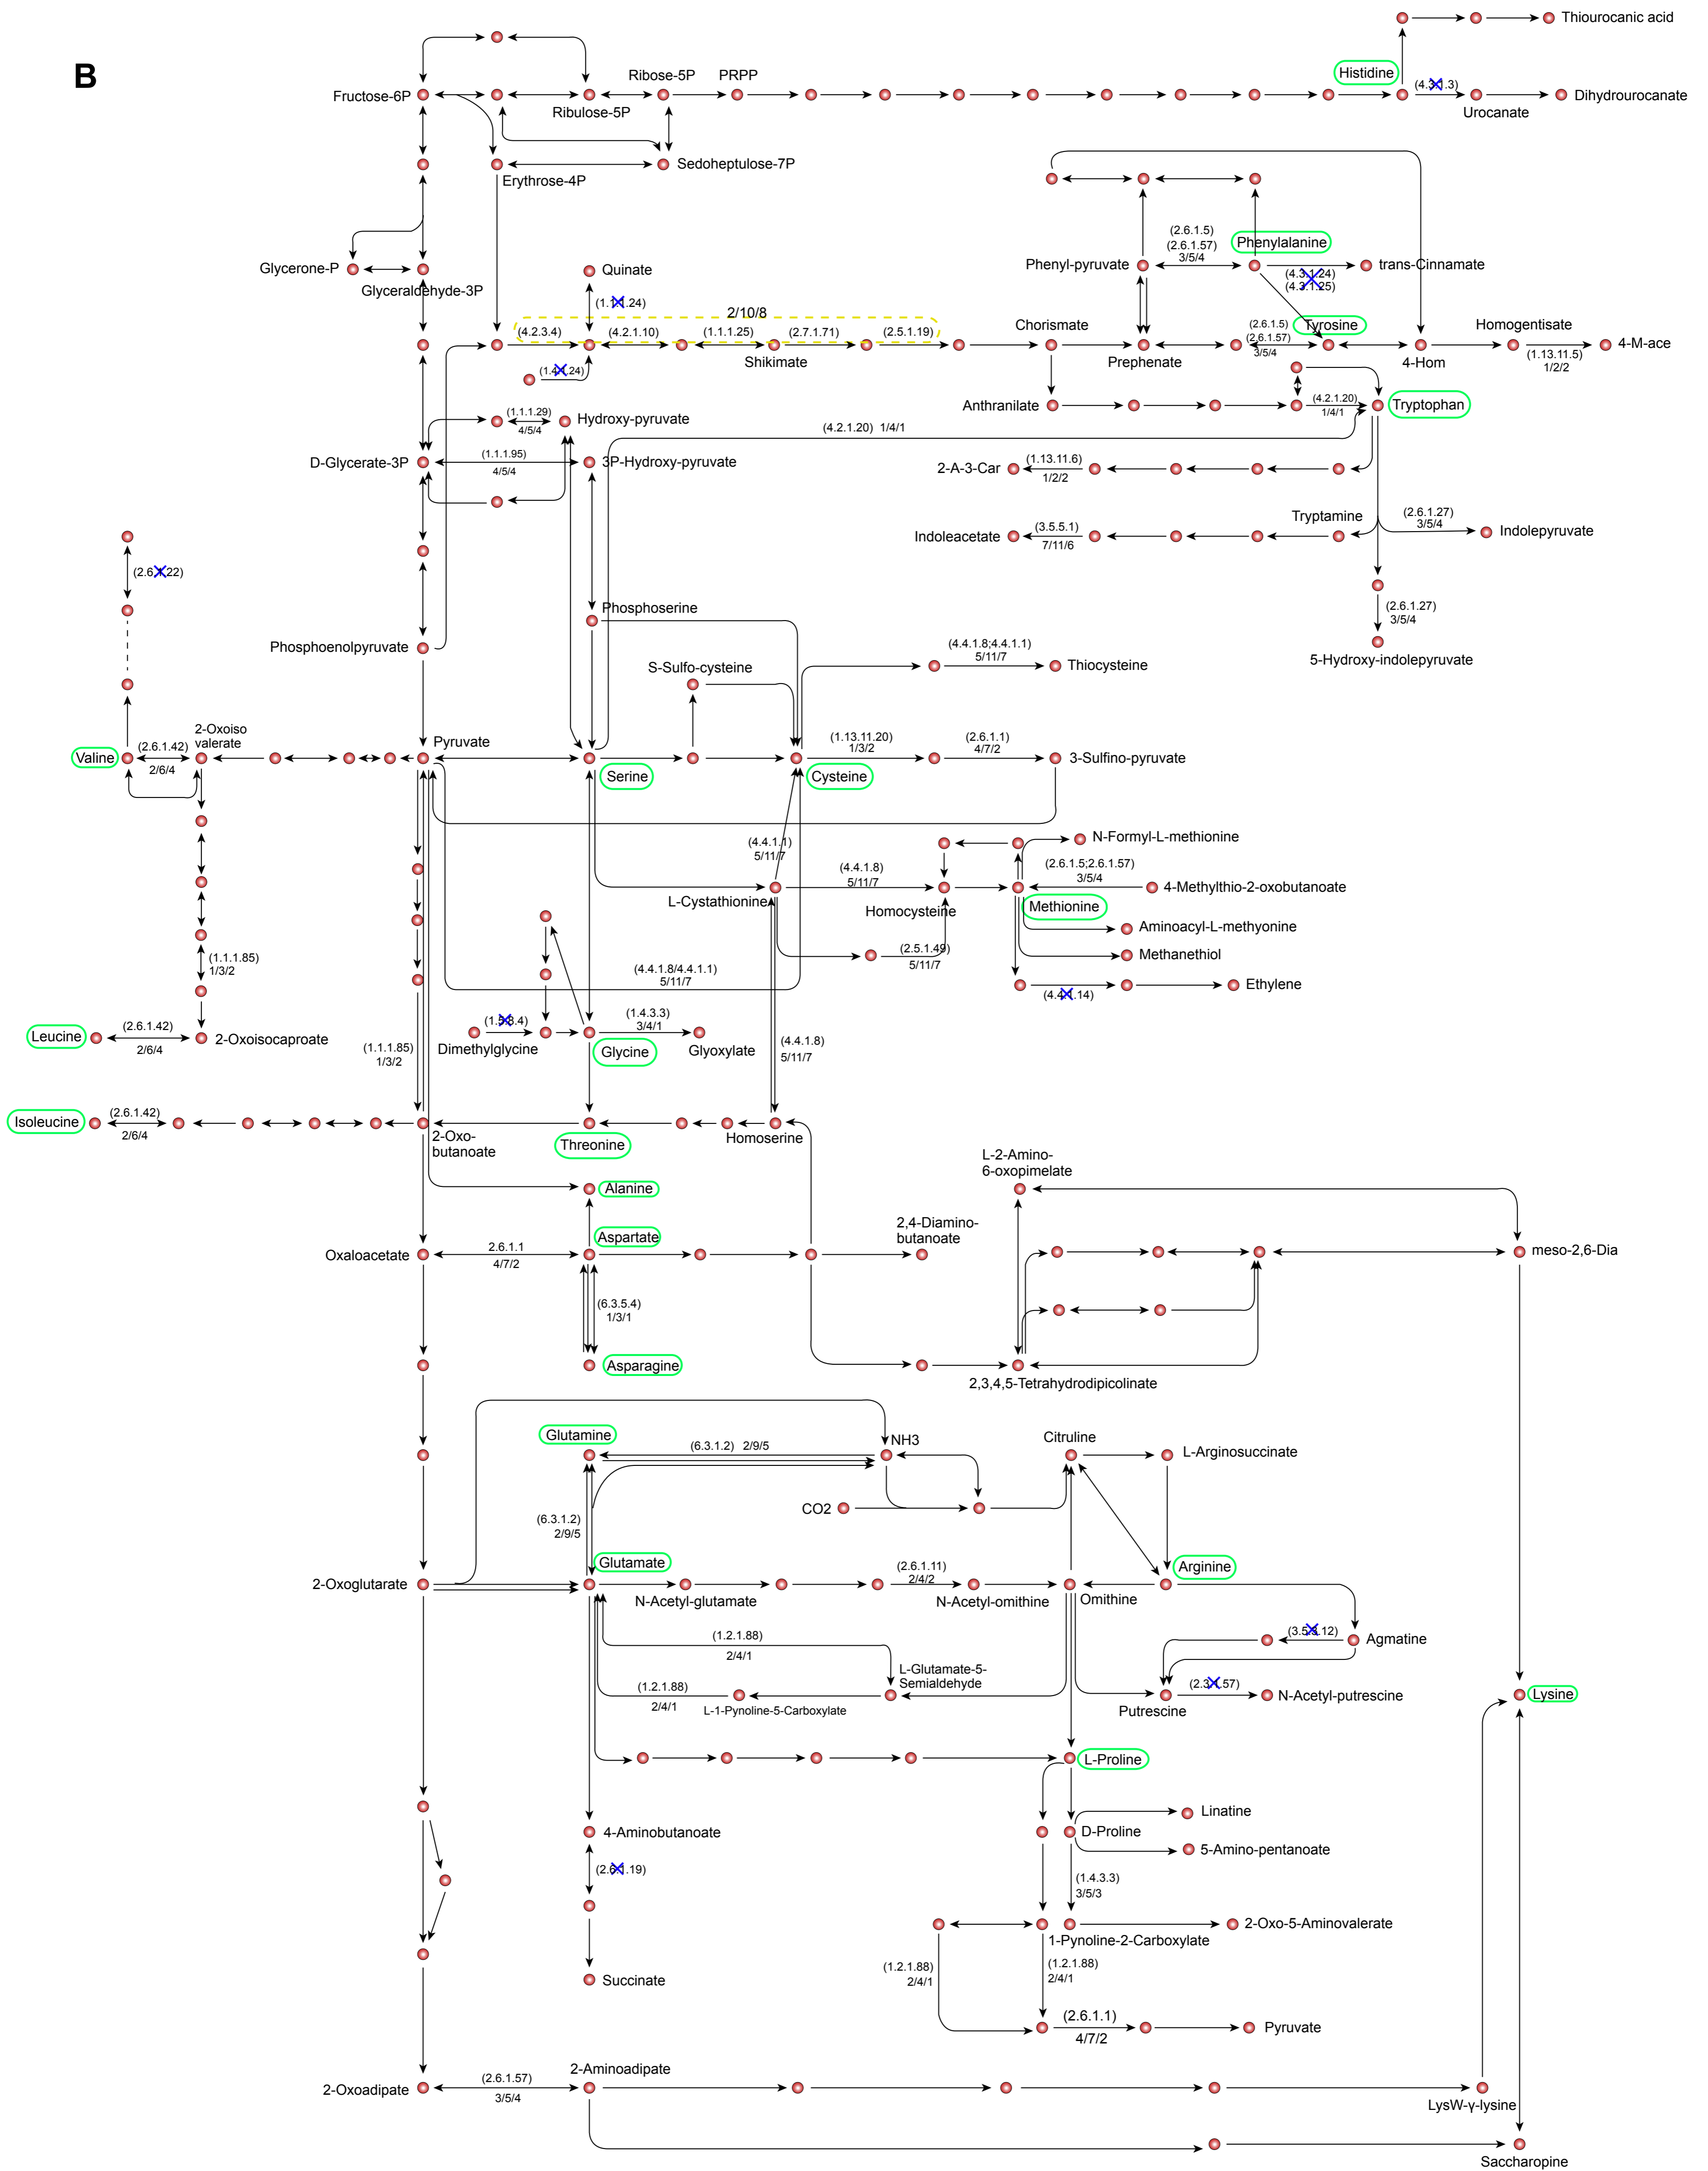

**Supplementary Figure S3. A metabolic pathway view of the gene redundancy of pathway members.** The gene redundancy of each member of metabolic pathways (A, carbohydrate; B, amino acid) in the *M. purpureus* YY-1 genome compared to *A. oryzae* and *A. fumigatus* is superimposed on the metabolic pathway map. Crosses indicate the missing genes in YY-1. The three values delimited by slashes designate the number of corresponding genes found in the *M. purpureus*, *A. oryzae* and *A. fumigatus* genomes, respectively. The metabolic pathway view was constructed based on the pathways included in KEGG (<http://www.genome.ad.jp/kegg/>)<sup>54</sup>.

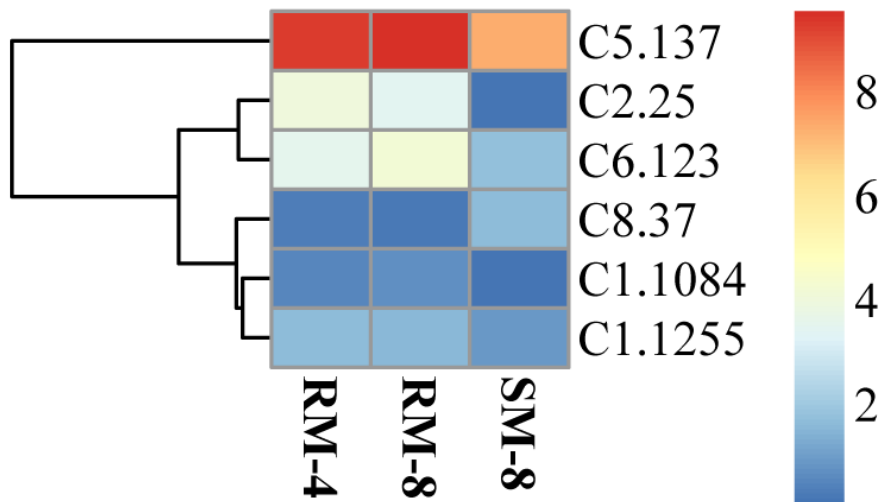

**Supplementary Figure S4. Gene expression of six PKS genes in *M. purpureus***

**YY-1.** The tree is a dendrogram of cluster analysis by the hclust method in R, which is a hierarchical partitioning of data that visually resembles a heat map, reflecting gene expression values in different conditions. RM-4 represents *M. purpureus* YY-1 grown in rice medium (RM) on the fourth day, RM-8 represents *M. purpureus* YY-1 grown in rice medium (RM) on the eighth day, and SM-8 represents *M. purpureus* YY-1 grown in sucrose–yeast extract medium (SM) on the eighth day.

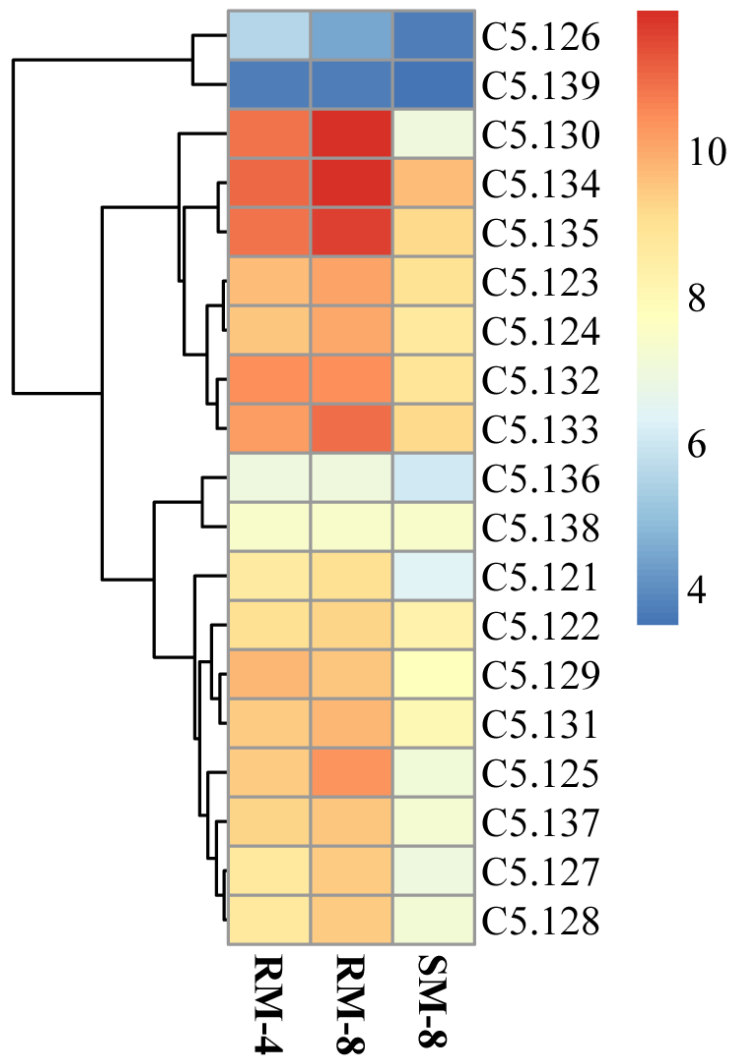

**Supplementary Figure S5. Gene expression of the pigment biosynthetic gene**

**cluster in *M. purpureus* YY-1.** The tree is a dendrogram of cluster analysis by the hclust method in R, which is a hierarchical partitioning of data that visually resembles a heat map, reflecting gene expression values in different conditions.

RM-4 represents *M. purpureus* YY-1 grown in rice medium (RM) on the fourth day, RM-8 represents *M. purpureus* YY-1 grown in rice medium (RM) on the eighth day, and SM-8 represents *M. purpureus* YY-1 grown in sucrose–yeast extract medium (SM) on the eighth day.

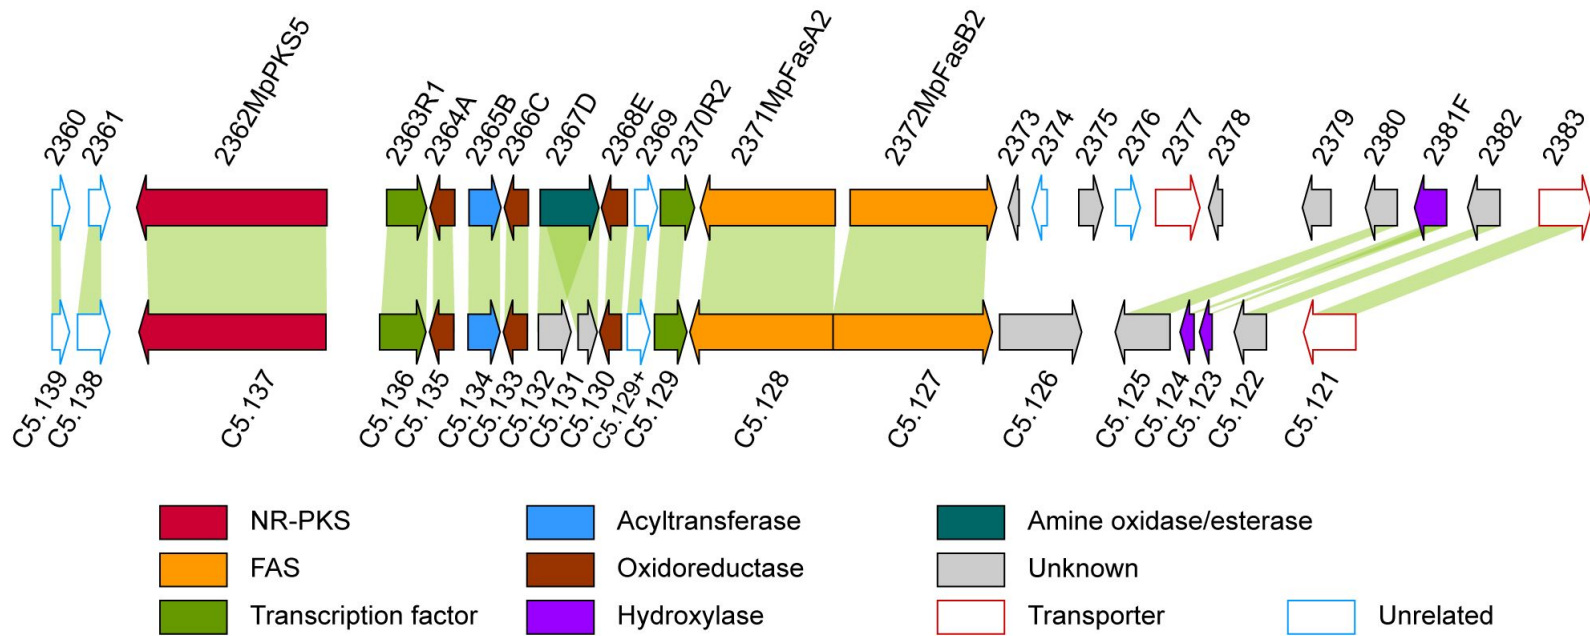

**Supplementary Figure S6. Synteny analysis of the pigment biosynthetic gene clusters in *M. pilosus* and *M. purpureus*.** The upper panel shows the gene cluster in the *M. pilosus* genome. The bottom panel shows the gene cluster in the *M. purpureus* genome.

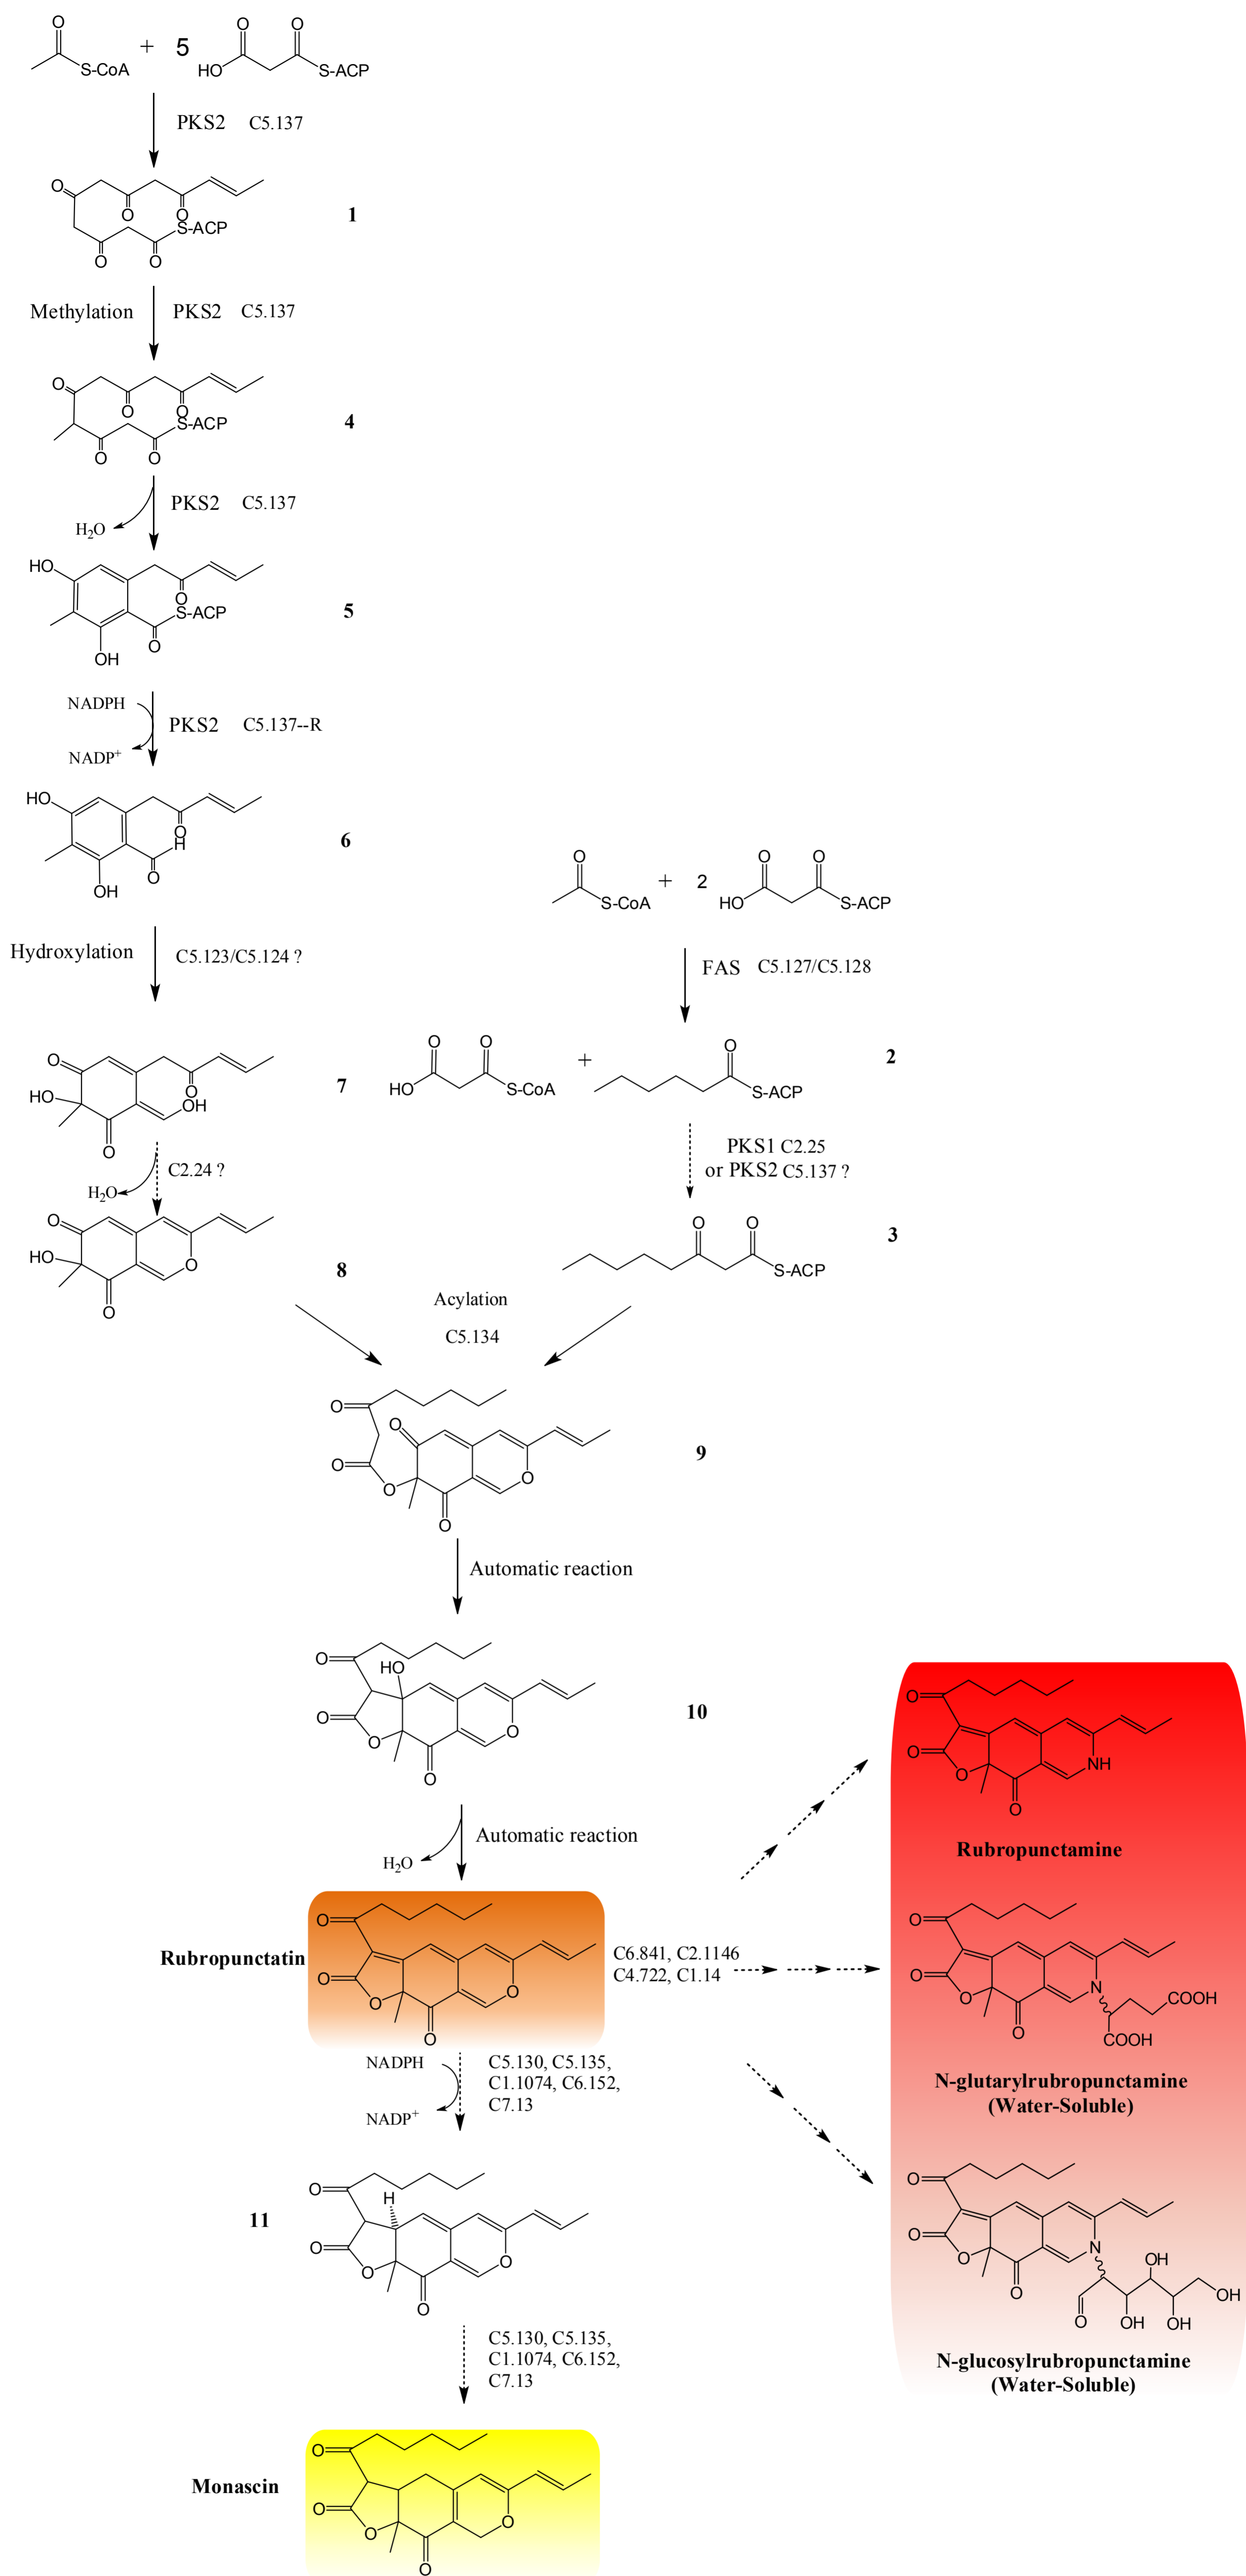

**Supplementary Figure S7 The proposed biosynthetic pathway for *Monascus* pigments, including orange pigment (rubropunctatin), yellow pigment (monascin), red pigment (rubropunctamine) and water-soluble pigments.** The solid arrows indicate the experimentally identified steps, and the dashed arrows indicate the speculative procedures. In the assembly of the skeleton structure of the pigments, a 12-carbon acyl chain 1 and  $\beta$ -keto group 2 are produced from acetyl-coenzyme A and malonyl-coenzyme A by the PKS2 gene C5.137<sup>57,58</sup> and FAS gene pair C5.127/C5.128<sup>12,13</sup>, respectively. We suggest that PKS2 acts as a dual-functioning PKS or that another PKS gene, PKS1 (C2.25), is responsible for the synthesis of compound 3<sup>18</sup>. The formation of the classical polyketide chromophore structure 8 involves methylation<sup>55</sup>, cyclization<sup>57</sup>, reduction<sup>58</sup>, hydroxylation<sup>59</sup> and dehydration, followed by compound 1 formation, successively. In parallel, the condensation product 3 has been proposed to be transferred to polyketide chromophore 8 by acylation from the acyl carrier protein (ACP)-domain to yield 9<sup>13,59,60</sup>. Then, the intermediate 9 is converted to orange pigment (rubropunctatin) by automatic dehydration. Orange pigments are used as the precursor for yellow and red pigments. The mechanisms by which orange pigments is converted to yellow pigment (monascin) are reduction steps in the existence of NADPH. Red pigment (rubropunctamine) and the water-soluble pigments may undergo further reduction and dehydration followed by amination<sup>61,62</sup>.



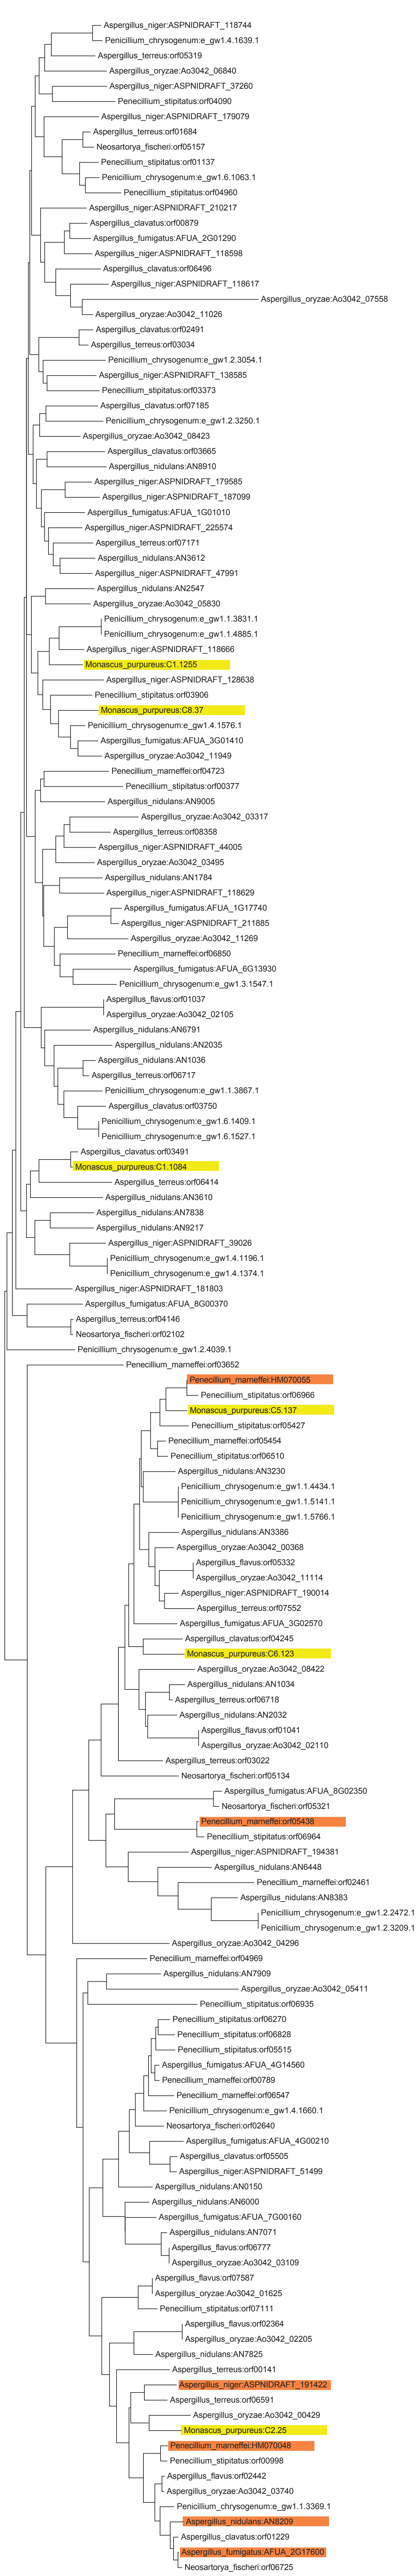

0.2

**Supplementary Figure S8. Phylogenetic analysis of PKS genes in 12 Eurotiales.** PKS genes of *M. purpureus* YY-1 are yellow colored, and the reported pigment-related PKS genes of relatives are orange colored.

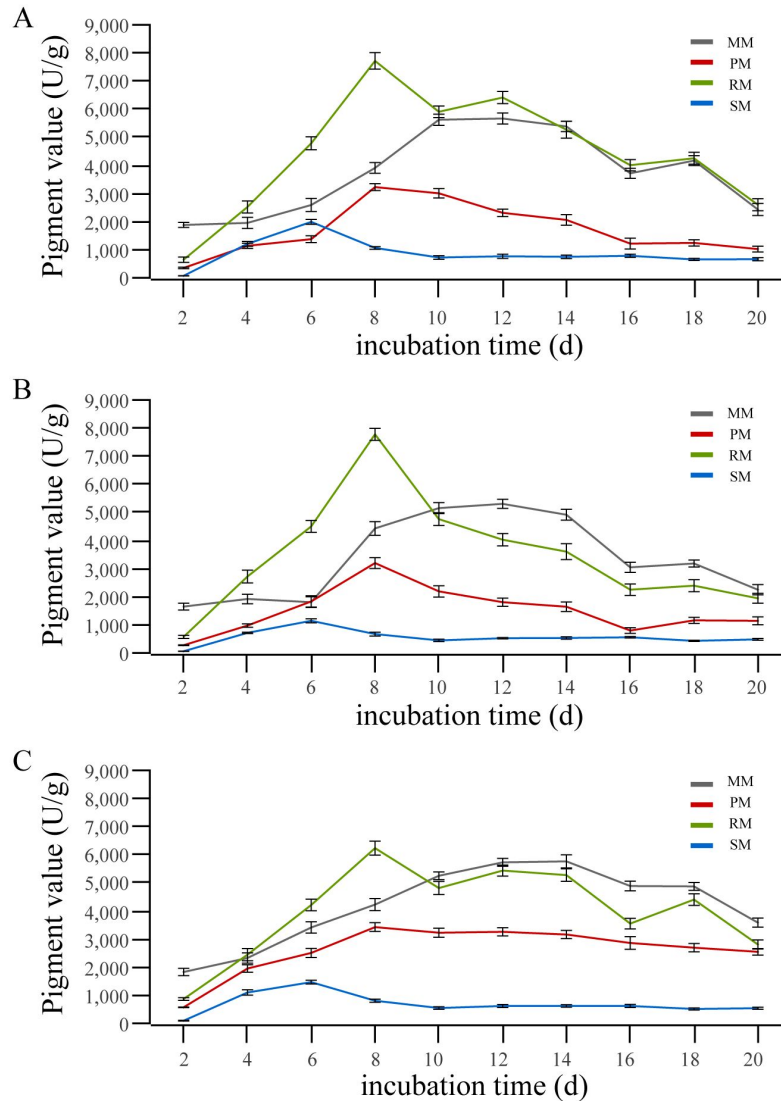

**Supplementary Figure S9. Pigment (red, orange and yellow pigments) production by *M. purpureus* YY-1 in four different mediums (malt medium (MM), potato/dextrose broth medium (PM), rice medium (RM) and sucrose–yeast extract medium (SM)) were monitored from the 2nd to the 20th day. All experiments were performed in triplicate. Error bars indicate the standard deviation.**

A. Red pigment production by *M. purpureus* YY-1.

B. Orange pigment production by *M. purpureus* YY-1.

C. Yellow pigment production by *M. purpureus* YY-1.

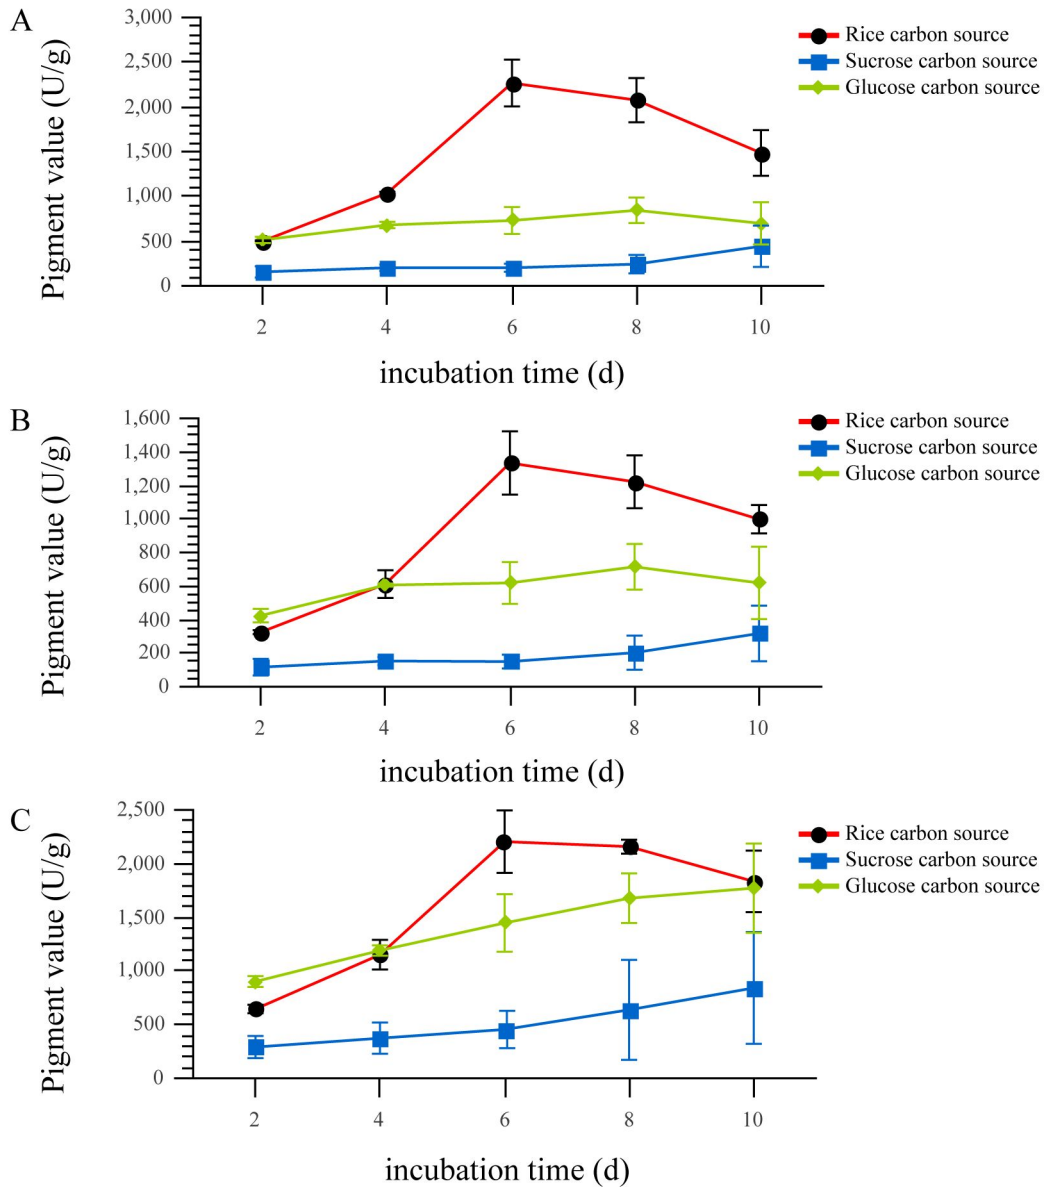

**Supplementary Figure S10. Pigment (red, orange and yellow pigments) production in *M. purpureus* YY-1 grown on media with different carbon sources (rice powder, glucose, and sucrose) from the 2nd to 10th days. All experiments were performed in triplicate. Error bars indicate the standard deviation.**

A. Red pigment production by *M. purpureus* YY-1.

B. Orange pigment production by *M. purpureus* YY-1.

C. Yellow pigment production by *M. purpureus* YY-1.



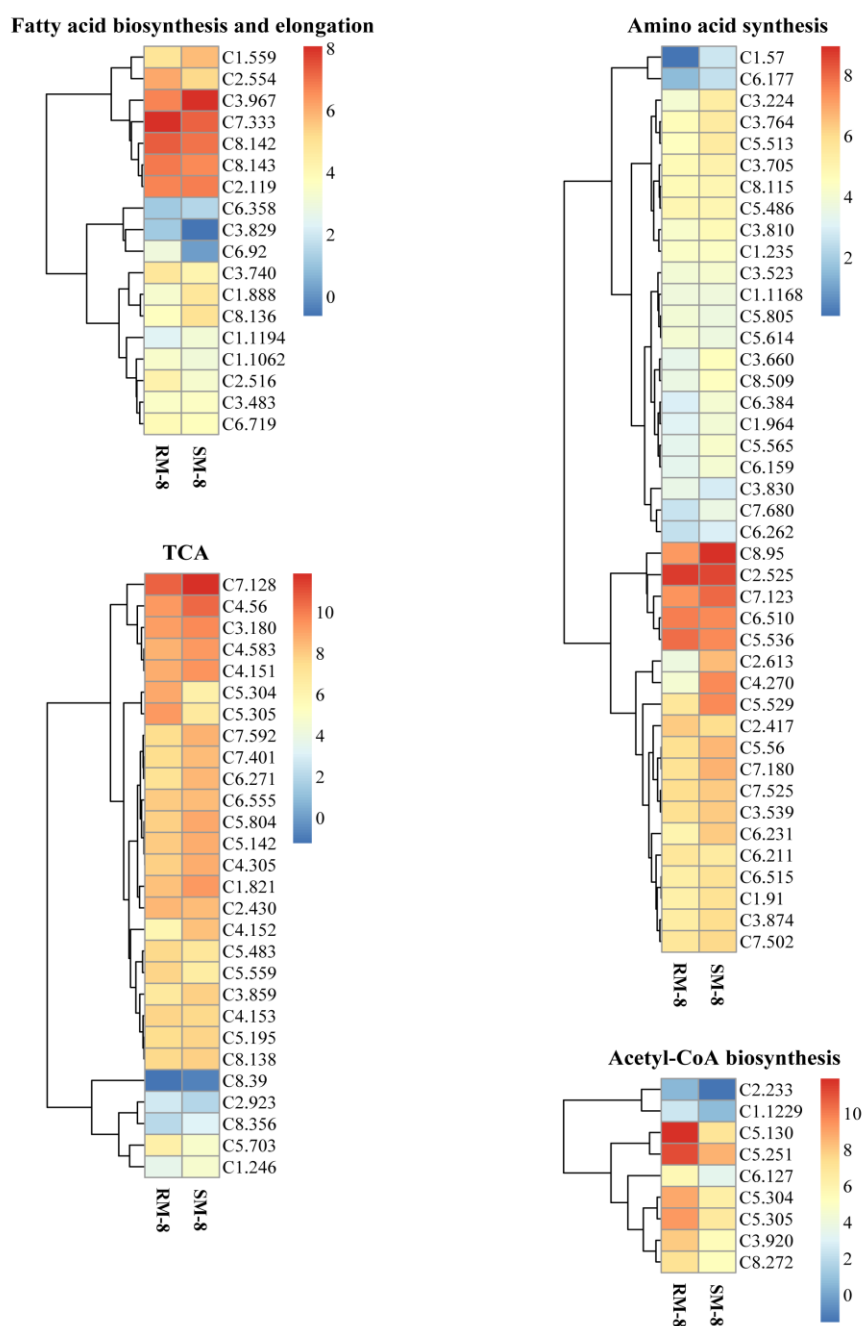

**Supplementary Figure S11. Gene expression in pigment biosynthesis-related metabolic pathways in *M. purpureus* YY-1 grown on different carbon sources.**

The tree is a dendrogram of cluster analysis by the hclust method in R, which is a hierarchical partitioning of data that visually resembles a heat map, reflecting

gene expression values in different conditions. RM-8 represents *M. purpureus* YY-1 grown in rice medium (RM) on the eighth day, and SM-8 represents *M. purpureus* YY-1 grown in sucrose–yeast extract medium (SM) on the eighth day.

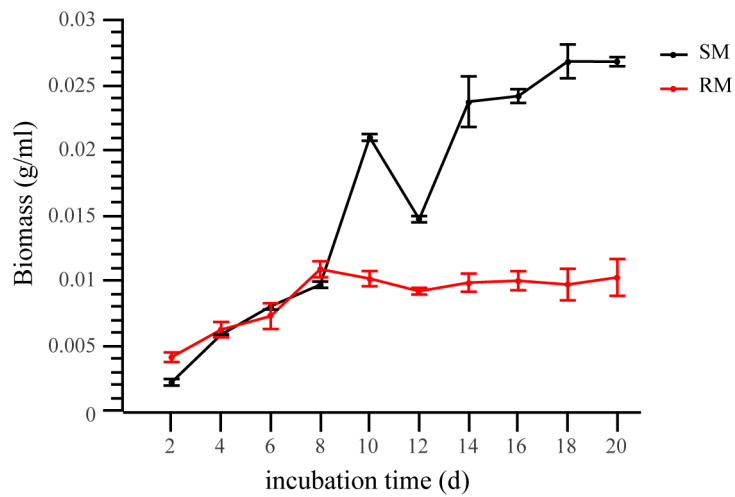

**Supplementary Figure S12. Biomass (dry cell weight) of *M. purpureus* YY-1 grown in rice medium (RM) and sucrose–yeast extract medium (SM) were monitored from the 2nd to 20th day. All experiments were performed in triplicate. Error bars indicate the standard deviation.**

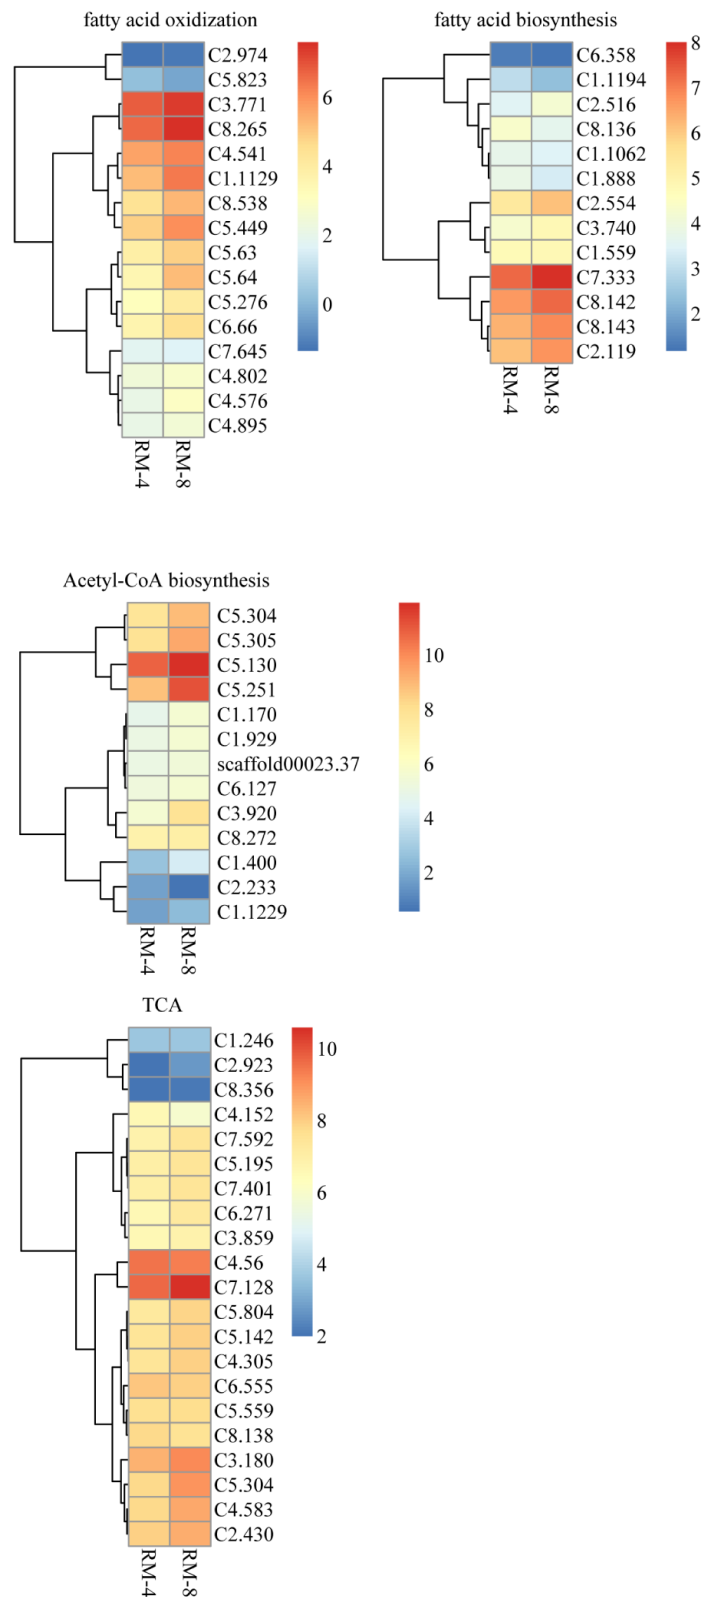

**Supplementary Figure S13. Gene expression in pigment biosynthesis-related metabolic pathways in *M. purpureus* YY-1 at different grown stages in rice**

**medium.** The tree is a dendrogram of cluster analysis by the hclust method in R, which is a hierarchical partitioning of data that visually resembles a heat map, reflecting gene expression values in different conditions. RM-4 represents *M. purpureus* YY-1 grown in rice medium (RM) on the fourth day, and RM-8 represents *M. purpureus* YY-1 grown in rice medium (RM) on the eighth day.

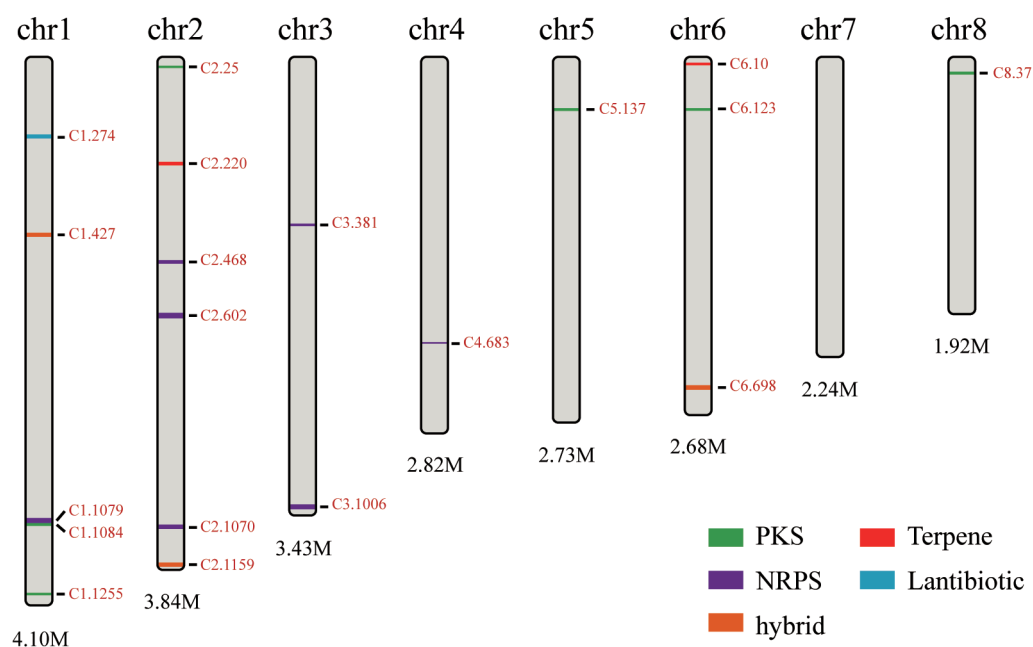

**Supplementary Figure S14. The location of secondary metabolic genes in *M. purpureus* YY-1.** Secondary metabolic genes predicted using the antiSMASH program are marked with different colors.

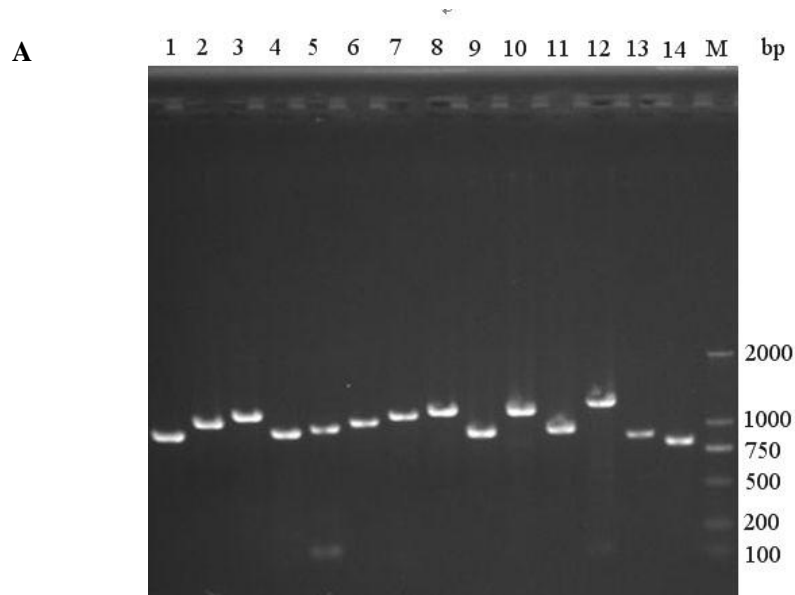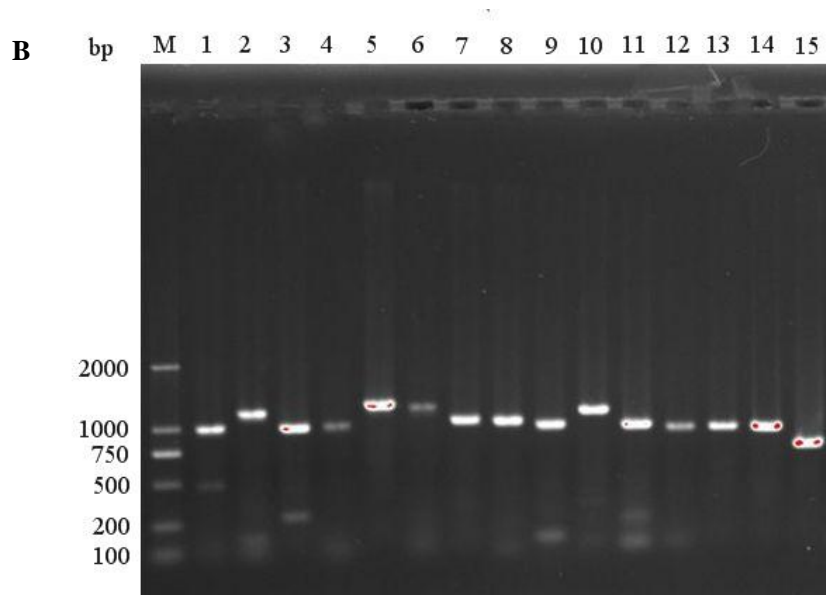

C

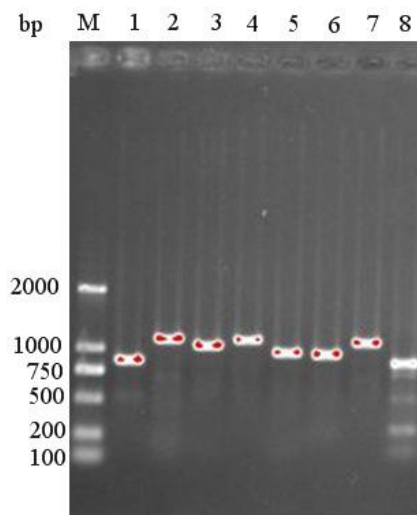

**Supplementary Figure S15. Agrose gel electrophoresis of PCR products which confirms the presence of PKS-NRPS hybrids (C1.427, C2.1159 and C6.698) in *M. purpureus* YY-1.** Specific DNA fragments with expected size (Supplementary Data S8) could be amplified from (A) C1.427, (B) C2.1159 and (C) C6.698, respectively.



## Supplementary References

- 54 Kanehisa, M., Goto, S., Furumichi, M., Tanabe, M. & Hirakawa, M. KEGG for representation and analysis of molecular networks involving diseases and drugs. *Nucleic Acids Res.* **38**, D355-D360 (2010).
- 55 Cox, R. J. Polyketides, proteins and genes in fungi: programmed nano-machines begin to reveal their secrets. *Organic & Biomolecular Chemistry* **5**, 2010-2026 (2007).
- 56 Crawford, J. M. *et al.* Deconstruction of iterative multidomain polyketide synthase function. *Science* **320**, 243-246 (2008).
- 57 Crawford, J. M. *et al.* Structural basis for biosynthetic programming of fungal aromatic polyketide cyclization. *Nature* **461**, 1139-1143 (2009).
- 58 Bailey, A. M. *et al.* Characterisation of 3-methylorcinaldehyde synthase (MOS) in *Acremonium strictum*: first observation of a reductive release mechanism during polyketide biosynthesis. *Chem. Commun.*, 4053-4055 (2007).
- 59 Zabala, Angelica O., Xu, W., Chooi, Y.-H. & Tang, Y. Characterization of a silent azaphilone gene cluster from *Aspergillus niger* ATCC 1015 reveals a hydroxylation-mediated pyran-ring formation. *Chem. Biol.* **19**, 1049-1059 (2012).
- 60 Xie, X., Meehan, M. J., Xu, W., Dorrestein, P. C. & Tang, Y. Acyltransferase mediated polyketide release from a fungal megasynthase. *J. Am. Chem. Soc.* **131**, 8388-8389 (2009).
- 61 Lin, T. F., Yakushijin, K., Büchi, G. H. & Demain, A. L. Formation of

water-soluble *Monascus* red pigments by biological and semi-synthetic processes. *J. Ind. Microbiol.* **9**, 173-179 (1992).

- 62 Hajjaj, H. *et al.* Production and identification of N-glucosylrubropunctamine and N-glucosylmonascorubramine from *Monascus ruber* and occurrence of electron donor-acceptor complexes in these red pigments. *Appl. Environ. Microbiol.* **63**, 2671-2678 (1997).
